# Supplementary material for: Current Practices and Beliefs Regarding Screening Patients with Burns for Acute Stress Disorder and Posttraumatic Stress Disorder: A Survey of the American Burn Association Membership
Source: MDPI journal article supplement (doi:10.3390/ebj2040016), 2021-11-01
Supplement: s1 [file s1]

Archive with 2 entries (2 files):
- ABA Stress Disorder Screening Survey.pdf
- EBJ_Supplemental Figures.pdf
