# Supplementary material for: Current Practices and Beliefs Regarding Screening Patients with Burns for Acute Stress Disorder and Posttraumatic Stress Disorder: A Survey of the American Burn Association Membership
Source: MDPI journal article supplement (doi:10.3390/ebj2040016), 2021-11-01
Supplement: s1 [file s1]

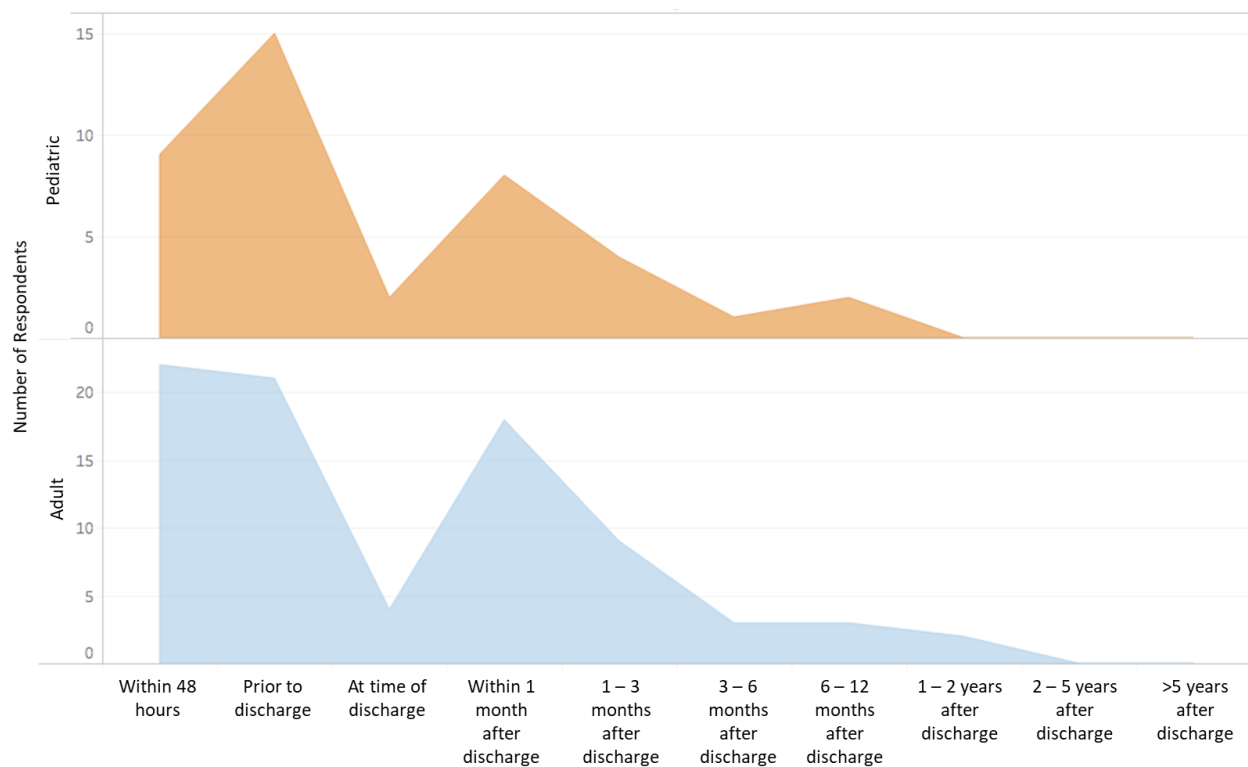

Figure S1: Timeline of Screening for Stress Disorder Symptoms

The first timepoint represented was listed as the following option in the survey “within 48 hours of admission or clearance of sedation and/or delirium.” Respondents were able to select more answer choice representing all timepoints that their institution screened for stress disorders.

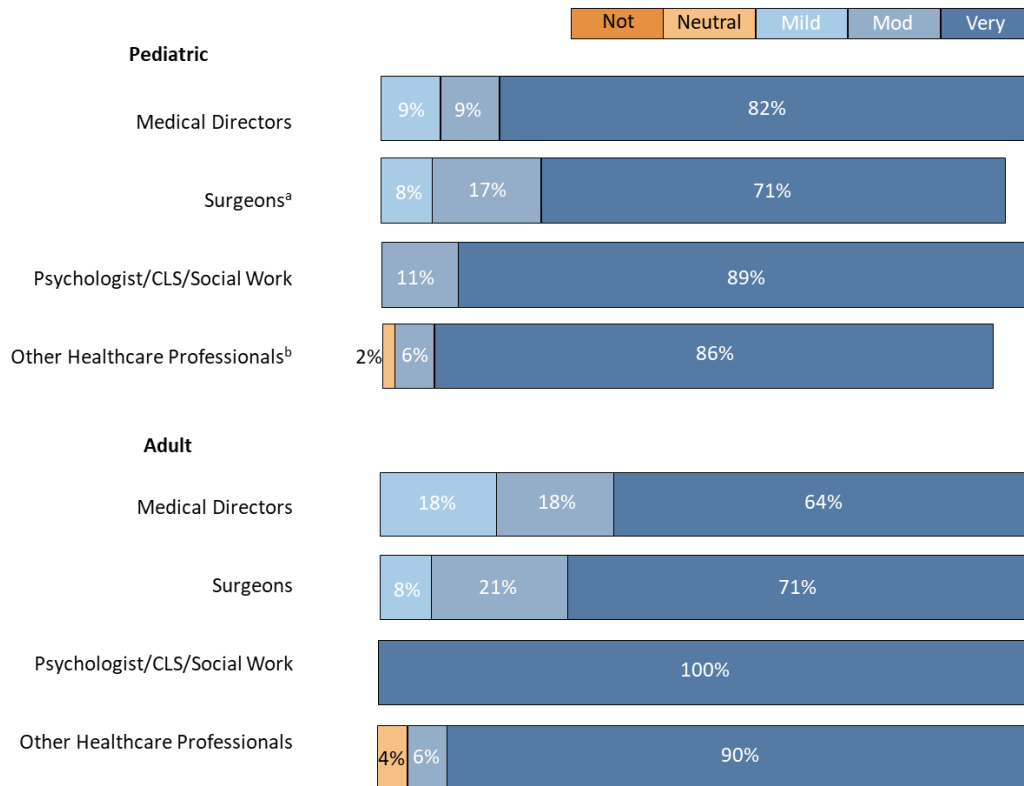

Figures include the responses from respondents who completed the personal belief section of the survey; n=94. <sup>a</sup>4% preferred not to reply; <sup>b</sup>6% preferred not to reply. Psych – Psychologist; CLS – Child Life Specialist; SW –Social Worker

**Figure S2: How important is it to screen patients with burn injuries for stress disorder symptoms as part of their burn care?**
